# Supplementary material
Source: Royal Society of Chemistry journal article supplement (doi:10.1039/d6ma00450d)
Supplement: d6ma00450d1.pdf [file d6ma00450d1.pdf]

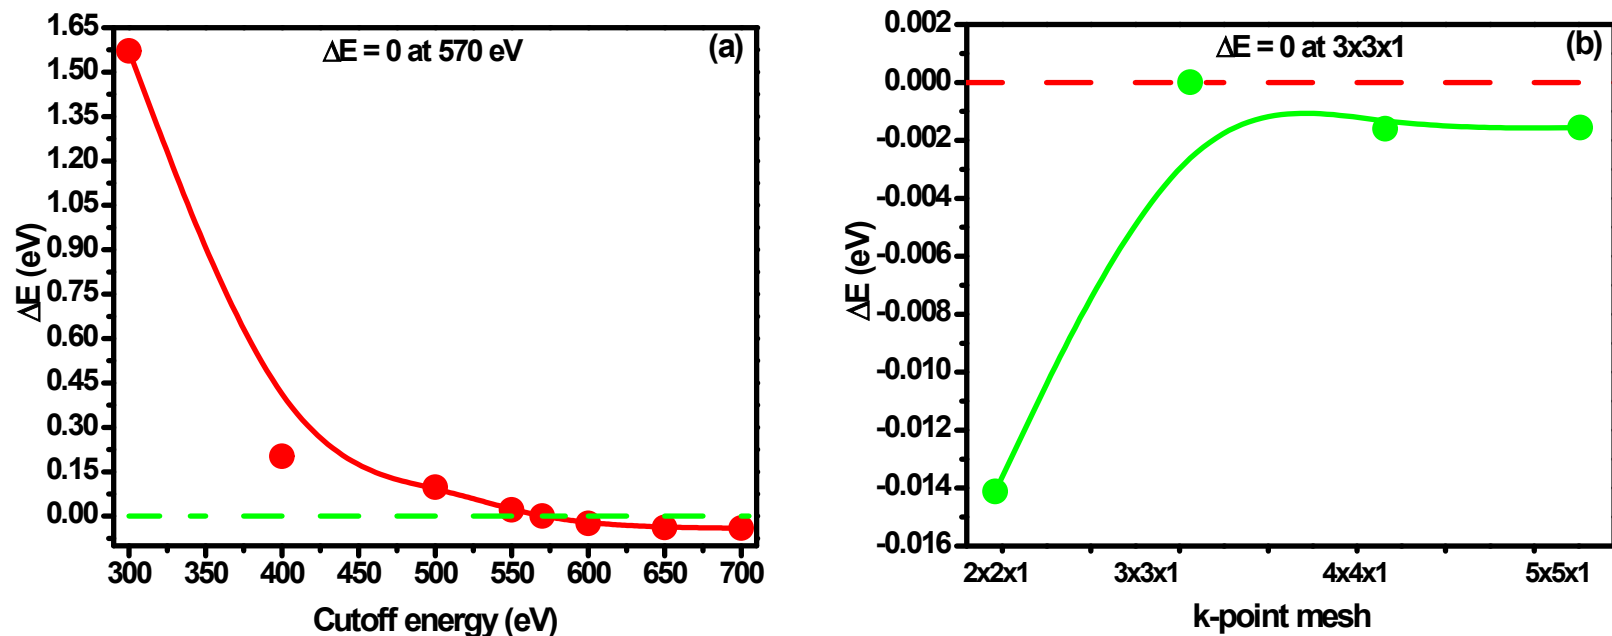

**Figure S1. Convergence tests for MgAgF<sub>3</sub> at 0 GPa.**

Convergence of the total energy with respect to (a) the plane-wave cutoff energy and (b) the **k**-point mesh, plotted as the energy difference  $\Delta E$  relative to the chosen parameters (570 eV and  $3 \times 3 \times 1$  mesh, respectively). The horizontal dashed line at  $\Delta E = 0$  indicates the reference value. In (a), the energy difference decreases rapidly above 500 eV, with  $\Delta E = 0.021$  eV at 550 eV and less than 0.025 eV for all cutoffs above 570 eV. In (b), increasing the **k**-point mesh from  $3 \times 3 \times 1$  to  $4 \times 4 \times 1$  changes the energy by only 0.0016 eV, confirming that the chosen parameters are well converged.
