# Supplementary material
Source: Royal Society of Chemistry journal article supplement (doi:10.1039/d6ma00450d)
Supplement: d6ma00450d2.pdf [file d6ma00450d2.pdf]

# High-Pressure Behavior of MgAgF<sub>3</sub> Perovskite

0 GPa  
Crystal  
Structure

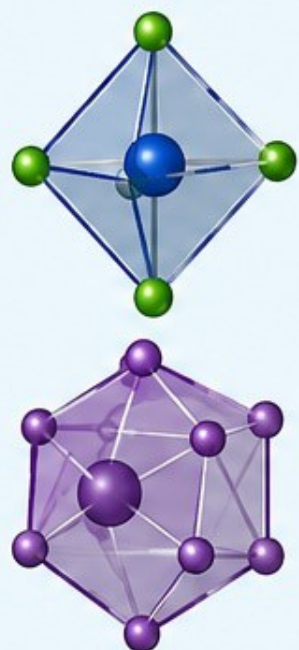

Mg  
F<sub>6</sub>

Ag  
9-fold

$a = 5.515 \text{ \AA}$   
 $c = 13.549 \text{ \AA}$

XRD Evolution

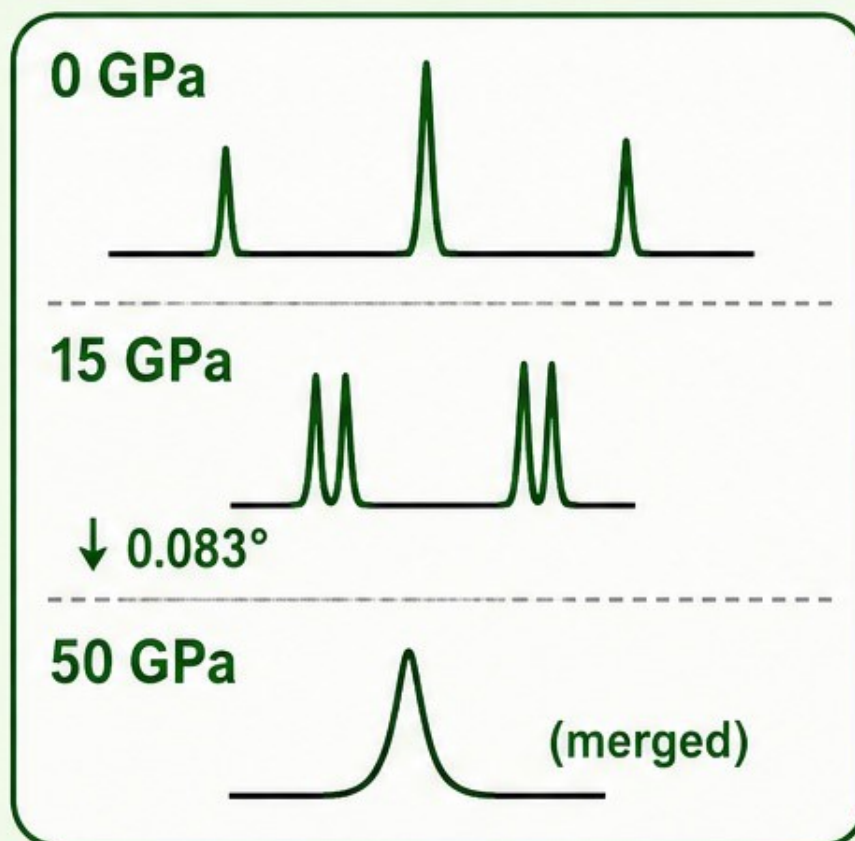

Simple → Doublet → Single

Band Gap Widening

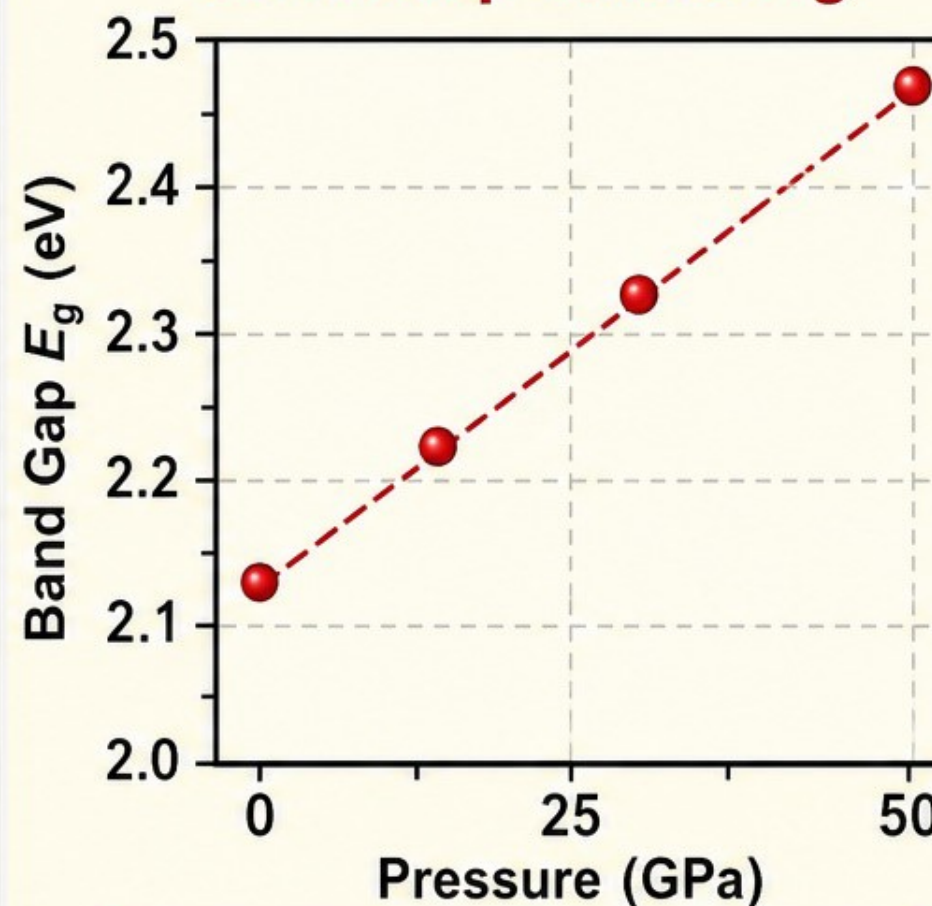

$$E_g = 2.137 + 0.00667P$$

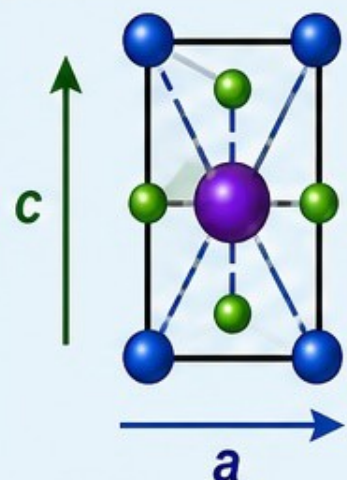

Anisotropic Compression:

$$B_{0,a} = 280.6 \text{ GPa} \quad B_{0,c} = 185.5 \text{ GPa}$$

Volume reduction:

**22.2% at 50 GPa**

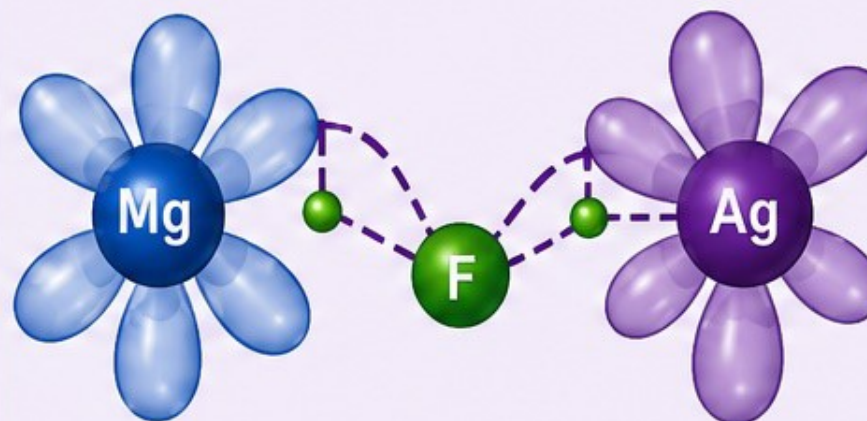

Induced *d*-states  
in Mg  
(Pressure-induced  
hybridization)
